# Supplementary material for: Flexible Modeling of Epidemics with an Empirical Bayes Framework
Source: PLOS journal article supplement (doi:10.1371/journal.pcbi.1004382), 2015-08-28
Supplement: S10 (10.1371/journal.pcbi.1004382.s010) [file journal.pcbi.1004382.s010]

## Importance sampling algorithm

**Data:**  $y^{r, s_{\text{curr}}}$ , the wILI observations so far;  $z^{r, s_{\text{curr}}}$ , a version of  $y^{r, s_{\text{curr}}}$  with two extra points estimated from GFT; prior distributions of wILI curves, noise levels, and transformations

**Result:** weighted collection of curves

Let  $\phi(x; \mu, \sigma)$  be the normal pdf;

**for** *a large number of times* **do**

Randomly draw  $f^r$ ,  $\sigma$ ,  $\nu$ ,  $\theta$ , and  $\mu$  from the corresponding priors;

Let  $f^{r, s_{\text{curr}}}(i) = f_4^r(i) = b^r + \frac{\theta^r - b^r}{\max_j f^r(j) - b^r} \left[ f^r \left( \frac{i - \mu^r}{\nu^r} + \arg \max_j f^r(j) \right) - b^r \right]$ ;

Calculate weight  $w = \prod_{i=1}^{\text{length}(z^{r, s_{\text{curr}}})} \phi(z; f^{r, s_{\text{curr}}}(i), \sigma)$ ;

Let  $v$  be a 53-length vector, a possible curve for this season;

**for**  $i$  *in*  $1..\text{length}(y^{r, s_{\text{curr}}})$  **do**

$v_i := y_i^{r, s_{\text{curr}}}$ ;

**end**

**for**  $i$  *in*  $(\text{length}(y^{r, s_{\text{curr}}}) + 1)..53$  **do**

$v_i := f^{r, s_{\text{curr}}}(i)$ ;

**end**

Add curve  $v$  with weight  $w$  to the collection of possibilities for this season (the posterior estimate)

**end**

### Algorithm 1: Importance sampling procedure

Note that, since the GFT estimates are not exact, we weight  $f^{r, s_{\text{curr}}}$  based on  $z^{r, s_{\text{curr}}}$ , using both ILINet wILI observations and GFT data, but we construct each possible curve  $v$  using  $f^{r, s_{\text{curr}}}$  and  $y^{r, s_{\text{curr}}}$ , using no GFT. However, since ILINet data can undergo revisions, we have also considered versions that construct each  $v$  ignoring some of the more recent values in  $y^{r, s_{\text{curr}}}$ .

To improve computational efficiency, we also use a modified version of the code above that first divides up the possible values of  $f^r$ ,  $\sigma$ ,  $\nu$ ,  $\theta$ , and  $\mu$  into bins and estimates the average weight of  $f^{r, s_{\text{curr}}}$ 's in each bin. By sampling values of  $f^r$ ,  $\sigma$ ,  $\nu$ ,  $\theta$ , and  $\mu$  more frequently from the higher-weighted bins (and correcting for this decision in the weight calculation), we are able to construct a collection of curves with a high total weight more quickly than the version above.
